# Supplementary material for: Single-Stranded Phosphorothioated Regions Enhance Cellular Uptake of Cholesterol-Conjugated siRNA but Not Silencing Efficacy
Source: PubMed Central journal article supplement (PMC7452107; doi:10.1016/j.omtn.2020.07.029), 2020-07-25
Supplement: mmc1.pdf [file mmc1.pdf]

**OMTN, Volume 21**

**Supplemental Information**

**Single-Stranded Phosphorothioated Regions  
Enhance Cellular Uptake of Cholesterol-Conjugated  
siRNA but Not Silencing Efficacy**

**Socheata Ly, Dimas Echeverria, Jacquelyn Sousa, and Anastasia Khvorova**

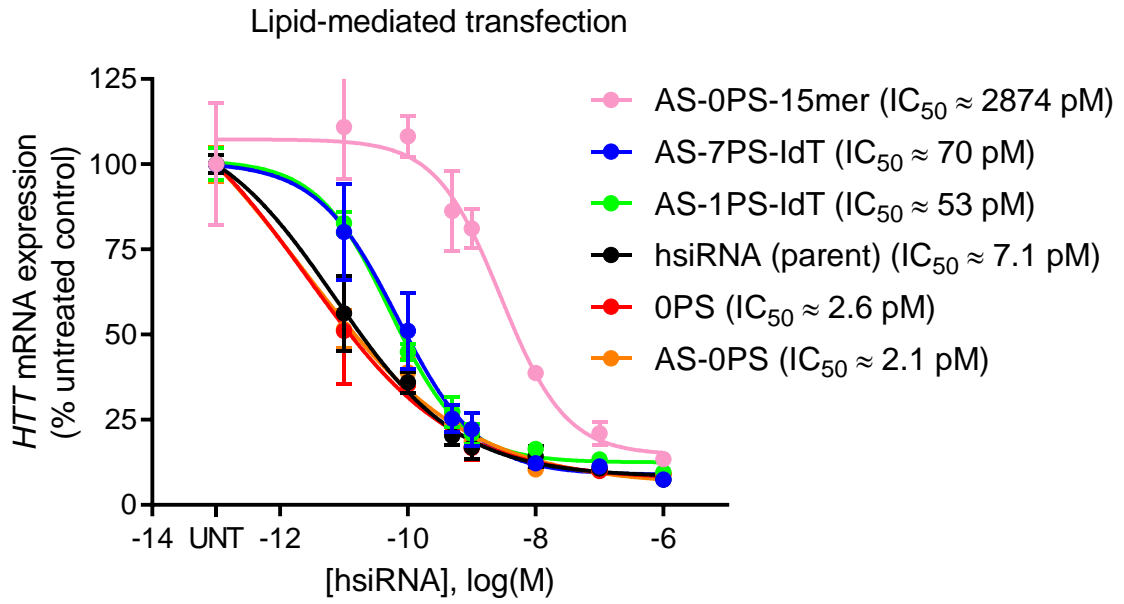

**Supplementary Figure 1. PS modifications used in this study are tolerated by RISC, but not a shorter 15-15mer or oligos containing 3' idT.** Seven-point dose response performed in HeLa cells transfected with RNAiMAX. *HTT* mRNA levels were quantified by QuantiGene Assay (Thermo Fisher) after 72 h treatment with hsiRNA. Representative data shown as mean  $\pm$  SD ( $n = 3$  technical replicates) from at least two independent experiments. UNT = untreated.

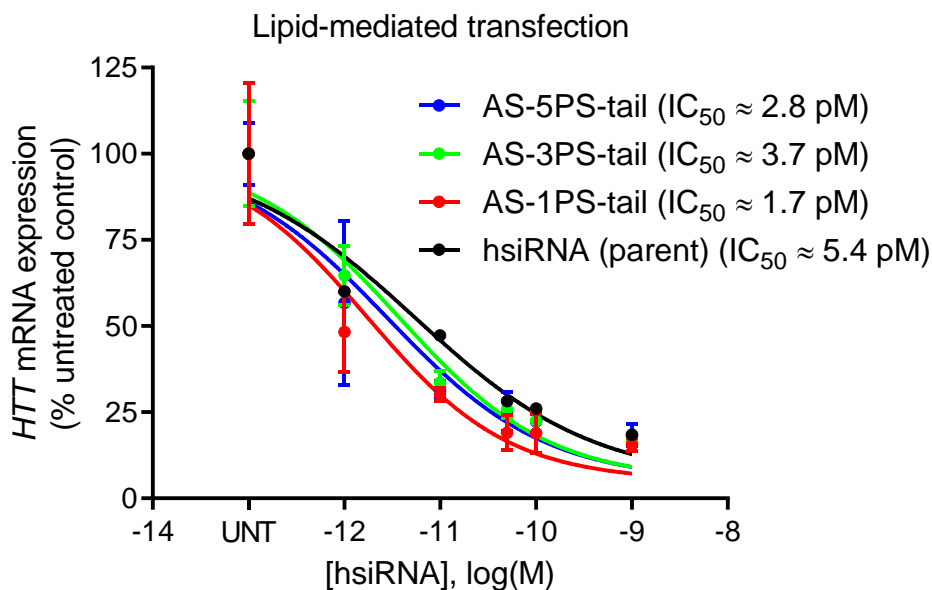

**Supplementary Figure 2. Oligos containing reduced PS tails load into RISC as well as the parent compound.** Seven-point dose response performed in HeLa cells transfected with RNAiMAX. *HTT* mRNA levels were quantified by QuantiGene Assay (Thermo Fisher) after 72 h treatment with hsiRNA. Representative data shown as mean  $\pm$  SD ( $n = 3$  technical replicates) from at least two independent experiments. UNT = untreated.

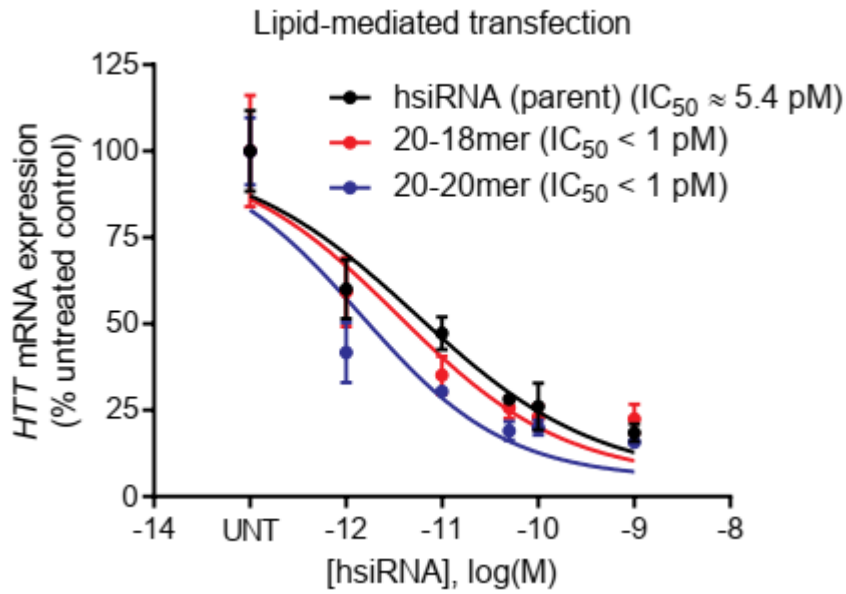

**Supplementary Figure 3. 20-20mer and 20-18mer oligos can efficiently silence mRNA via the RNAi pathway.** Seven-point dose response performed in HeLa cells transfected with RNAiMAX. *HTT* mRNA levels were quantified by QuantiGene Assay (Thermo Fisher) after 72 h treatment with hsiRNA. Representative data shown as mean  $\pm$  SD ( $n = 3$  technical replicates) from at least two independent experiments. UNT = untreated.

| oligo          | strand                            | sequence (5' to 3')                                                                                |
|----------------|-----------------------------------|----------------------------------------------------------------------------------------------------|
| HTT            | antisense                         | P(mU)#(fU)#(mA)(fA)(mU)(fC)(mU)(fC)(mU)(fU)(mU)(fA)(mC)#(fU)#(mG)#(fA)#(mU)#(fA)#(mU)#(fA)         |
| HTT            | sense                             | CyMN3-(fC)#(mA)#(fG)(mU)(fA)(mA)(fA)(mG)(fA)(mG)(fA)(mU)(fU)#(mA)#(fA)-TegChol                     |
| sFLT           | antisense                         | P(mU)#(fA)#(mA)(fA)(mU)(fU)(mU)(fG)(mG)(fA)(mG)(fA)(mU)#(fC)#(mC)#(fG)#(mA)#(fG)#(mA)#(fG)         |
| sFLT           | sense                             | CyMN3-(fG)#(mG)#(fA)(mU)(fC)(mU)(fC)(mC)(fA)(mA)(fA)(mU)(fU)#(mU)#(fA)-TegChol                     |
| AS-1PS         | antisense                         | P(mU)#(fU)#(mA)(fA)(mU)(fC)(mU)(fC)(mU)(fU)(mU)(fA)(mC)(fU)(mG)(fA)(mU)(fA)(mU)#(fA)               |
| AS-1PS         | sense                             | CyMN3-(fC)#(mA)#(fG)(mU)(fA)(mA)(fA)(mG)(fA)(mG)(fA)(mU)(fU)#(mA)#(fA)-TegChol                     |
| AS-3PS         | antisense                         | P(mU)#(fU)#(mA)(fA)(mU)(fC)(mU)(fC)(mU)(fU)(mU)(fA)(mC)(fU)(mG)(fA)(mU)#(fA)#(mU)#(fA)             |
| AS-3PS         | sense                             | CyMN3-(fC)#(mA)#(fG)(mU)(fA)(mA)(fA)(mG)(fA)(mG)(fA)(mU)(fU)#(mA)#(fA)-TegChol                     |
| AS-5PS         | antisense                         | P(mU)#(fU)#(mA)(fA)(mU)(fC)(mU)(fC)(mU)(fU)(mU)(fA)(mC)(fU)(mG)#(fA)#(mU)#(fA)#(mU)#(fA)           |
| AS-5PS         | sense                             | CyMN3-(fC)#(mA)#(fG)(mU)(fA)(mA)(fA)(mG)(fA)(mG)(fA)(mU)(fU)#(mA)#(fA)-TegChol                     |
| 20-20mer       | antisense                         | P(mU)#(fA)#(mA)(fA)(mU)(fU)(mU)(fG)(mG)(fA)(mG)(fA)(mU)#(fC)#(mC)#(fG)#(mA)#(fG)#(mA)#(fG)         |
| 20-20mer       | sense                             | CyMN3-(mU)#(fA)#(mU)(fA)(mU)(fC)(mA)(fG)(mU)(fA)(mA)(fA)(mG)(fA)(mG)(fA)(mU)(fU)#(mA)#(fA)-TegChol |
| 20-18mer       | antisense                         | P(mU)#(fA)#(mA)(fA)(mU)(fU)(mU)(fG)(mG)(fA)(mG)(fA)(mU)#(fC)#(mC)#(fG)#(mA)#(fG)#(mA)#(fG)         |
| 20-18mer       | sense                             | CyMN3-(mU)#(fA)#(mU)(fC)(mA)(fG)(mU)(fA)(mA)(fA)(mG)(fA)(mG)(fA)(mU)(fU)#(mA)#(fA)-TegChol         |
| HTT15/sFLT5    | antisense                         | P(mU)#(fU)#(mA)(fA)(mU)(fC)(mU)(fC)(mU)(fU)(mU)(fA)(mC)#(fU)#(mG)#(fG)#(mA)#(fG)#(mA)#(fG)         |
| HTT15/sFLT5    | sense                             | CyMN3-(fC)#(mA)#(fG)(mU)(fA)(mA)(fA)(mG)(fA)(mG)(fA)(mU)(fU)#(mA)#(fA)-TegChol                     |
| sFLT15/HTT5    | antisense                         | P(mU)#(fA)#(mA)(fA)(mU)(fU)(mU)(fG)(mG)(fA)(mG)(fA)(mU)#(fC)#(mC)#(fA)#(mU)#(fA)#(mU)#(fA)         |
| sFLT15/HTT5    | sense                             | CyMN3-(fG)#(mG)#(fA)(mU)(fC)(mU)(fC)(mC)(fA)(mA)(fA)(mU)(fU)#(mU)#(fA)-TegChol                     |
| OPS            | antisense                         | P(mU)(fU)(mA)(fA)(mU)(fC)(mU)(fC)(mU)(fU)(mU)(fA)(mC)(fU)(mG)(fA)(mU)(fA)(mU)(fA)                  |
| OPS            | sense                             | CyMN3-(fC)(mA)(fG)(mU)(fA)(mA)(fA)(mG)(fA)(mG)(fA)(mU)(fU)(mA)(fA)-TegChol                         |
| AS-0PS         | antisense                         | P(mU)(fU)(mA)(fA)(mU)(fC)(mU)(fC)(mU)(fU)(mU)(fA)(mC)(fU)(mG)(fA)(mU)(fA)(mU)(fA)                  |
| AS-0PS         | sense                             | CyMN3-(fC)#(mA)#(fG)(mU)(fA)(mA)(fA)(mG)(fA)(mG)(fA)(mU)(fU)#(mA)#(fA)-TegChol                     |
| AS-7PS-idT     | antisense                         | P(mU)#(fU)#(mA)(fA)(mU)(fC)(mU)(fC)(mU)(fU)(mU)(fA)(mC)#(fU)#(mG)#(fA)#(mU)#(fA)#(mU)#(reverse dT) |
| AS-7PS-idT     | sense                             | CyMN3-(fC)#(mA)#(fG)(mU)(fA)(mA)(fA)(mG)(fA)(mG)(fA)(mU)(fU)#(mA)#(fA)-TegChol                     |
| AS-1PS-idT     | antisense                         | P(mU)(fU)(mA)(fA)(mU)(fC)(mU)(fC)(mU)(fU)(mU)(fA)(mC)(fU)(mG)(fA)(mU)(fA)(mU)#(reverse dT)         |
| AS-1PS-idT     | sense                             | CyMN3-(fC)#(mA)#(fG)(mU)(fA)(mA)(fA)(mG)(fA)(mG)(fA)(mU)(fU)#(mA)#(fA)-TegChol                     |
| AS-0PS-15mer   | antisense                         | P(mU)(fU)(mA)(fA)(mU)(fC)(mU)(fC)(mU)(fU)(mU)(fA)(mC)(fU)(mG)                                      |
| AS-0PS-15mer   | sense                             | CyMN3-(fC)#(mA)#(fG)(mU)(fA)(mA)(fA)(mG)(fA)(mG)(fA)(mU)(fU)#(mA)#(fA)-TegChol                     |
| No cholesterol | antisense                         | P(mU)#(fU)#(mA)(fA)(mU)(fC)(mU)(fC)(mU)(fU)(mU)(fA)(mC)#(fU)#(mG)#(fA)#(mU)#(fA)#(mU)#(fA)         |
| No cholesterol | sense                             | CyMN3-(fC)#(mA)#(fG)(mU)(fA)(mA)(fA)(mG)(fA)(mG)(fA)(mU)(fU)#(mA)#(fA)                             |
|                |                                   |                                                                                                    |
|                |                                   |                                                                                                    |
| <b>KEY</b>     |                                   |                                                                                                    |
| P              | 5' phosphate                      |                                                                                                    |
| mN             | 2'-O-methyl                       |                                                                                                    |
| fN             | 2'-flouro                         |                                                                                                    |
| #              | phosphorothioate                  |                                                                                                    |
| CyMN3          | Cy3                               |                                                                                                    |
| TegChol        | tetra ethylene glycol cholesterol |                                                                                                    |
| reverse dT     | 3' to 3' reverse dT               |                                                                                                    |

**Supplementary Table 1. List of oligonucleotides used in this study. See Materials and Methods for information on how the oligonucleotides were synthesized. Key: P, 5' phosphate; mN, 2'-O-methyl; fN, 2'-flouro; #, phosphorothioate, CyMN3, Cy3; TegChol, tetra ethylene glycol cholesterol; reverse dT, 3' to 3' reverse dT.**
